1 **Unique Geographical Features of Out-of-Hospital Cardiac Arrest Patients within urban**  
2 **area: A Bayesian Spatial Analysis**

3 **Short title:** Out-of-Hospital Cardiac Arrests in urban area

4

5 Atsushi Senda M.D., Ph.D.

6

7 Graduate School of Medical and Dental Sciences, Tokyo Medical and Dental University,

8 Tokyo, Japan

9

10 **Corresponding author:**

11 Atsushi Senda

12 Department of Acute Critical Care and Disaster Medicine

13 Graduate School of Medical and Dental Sciences, Tokyo Medical and Dental University 1-5-

14 45 Yushima, Bunkyo-ku, Tokyo 1138510, Japan

15 Phone: +81-3-3813-6111

16 ORCID iD: <https://orcid.org/0000-0002-0128-6800>

17 E-mail: [sendaccm@tmd.ac.jp](mailto:sendaccm@tmd.ac.jp)

18

19 Word count: 2150 words

20

21 **Abstract**

22 **Background:** The advantages of urban areas for patients with out-of-hospital cardiac arrest  
23 (OHCA), attributable to their extensive medical resources, are well recognized. However,  
24 whether a greater abundance of these resources directly improves patient outcomes is unclear.  
25 Moreover, it is important to clarify this because of the ongoing global trend of urbanization.  
26 Therefore, this study aimed to investigate this issue and shed light on the potential challenges  
27 specific to urban environments.

28 **Methods:** This retrospective observational study was conducted to evaluate the correlation  
29 between the geographical features of patients with shockable OHCA and neurological  
30 outcomes. Data of patients who were transported to Tokyo Medical and Dental University  
31 Hospital between June 1, 2016, and May 30, 2022, were extracted from electronic review  
32 board records. The Glasgow-Pittsburgh Cerebral Performance Category Scale was utilized to  
33 evaluate the neurological results. The study employed Bayesian spatial modeling and  
34 analyzed the results using the Integrated Nested Laplace Approximation and Stochastic  
35 Partial Differential Equation methods.

36 **Results:** Paradoxically, a region with the highest concentration of advanced medical facilities  
37 exhibited the poorest neurological outcomes. This area was characterized by an extended  
38 duration of on-site emergency medical service activity, which strongly correlated with a  
39 negative impact on patients' neurological outcomes.

40 **Conclusions:** The abundance of healthcare resources in urban areas does not necessarily  
41 correlate with improved outcomes for patients with OHCA. A strategic approach to medical  
42 control that considers these factors can potentially enhance the outcomes of patients with  
43 OHCA in urban areas.

44

45 **Keywords:** out-of-hospital cardiac arrest, Integrated Nested Laplace Approximation,  
46 Stochastic Partial Differential Equation, spatial modeling, urban, gaussian process, Bayesian,  
47 Japan, medical control

48

49 **Non-standard Abbreviations and Acronyms**

50 CPC: Glasgow–Pittsburgh Cerebral Performance Category

51 DNAR: do not attempt to resuscitate

52 EMS: emergency medical services

53 INLA: Integrated Nested Laplace Approximation

54 OHCA: out-of-hospital cardiac arrest

55 SPDE: Stochastic Partial Differential Equation

56 TMDU: Tokyo Medical and Dental University Hospital

57

58

59

60

61

62

63

64

65

66

67

68



69 **Clinical Perspectives**

70 *What is new?*

71 In a retrospective geographical analysis of patients with shockable Out-of-Hospital Cardiac  
72 Arrest (OHCA), it was found that the region with the highest concentration of advanced  
73 medical facilities paradoxically exhibited the poorest neurological outcomes. Additionally,  
74 there was a noticeable extension in the duration of on-site emergency medical service activity  
75 in this area.

76 *What are the clinical implications?*

77 The abundance of healthcare resources in urban areas does not necessarily equate to  
78 improved outcomes for patients with OHCA. Therefore, a strategic approach to medical  
79 resource management should be considered to effectively utilize these resources and enhance  
80 the outcomes of patients in urban areas.

81

82

## 83 **Introduction**

84 Despite advancements in emergency medicine, the survival rate and neurological outcomes  
85 for out-of-hospital cardiac arrest (OHCA) are suboptimal.<sup>1,2</sup> The prognosis for OHCA is  
86 influenced by various factors, including age,<sup>3</sup> sex,<sup>4</sup> and comorbidities.<sup>5</sup> Prompt action by  
87 bystanders and emergency medical services (EMS),<sup>6-9</sup> coupled with comprehensive hospital  
88 treatment, can enhance neurological outcomes.<sup>10,11</sup> Furthermore, spatial factors such as  
89 population density<sup>12</sup> and rural–urban differences<sup>6,13</sup> significantly affect the prognosis of  
90 OHCA. These findings highlight the advantages of urban environments, primarily due to the  
91 availability and accessibility of extensive medical resources.

92         There are trends of urbanization worldwide, and it is presumed that nearly 10 billion  
93 people are projected to live in urban areas by 2050.<sup>14,15</sup> Tokyo, one of the world’s most  
94 densely populated urban areas,<sup>16</sup> has over 250 active EMS units and more than 10 tertiary  
95 emergency hospitals, specializing in treating life-threatening conditions.<sup>17</sup> This level of  
96 preparedness makes Tokyo a prime exemplar of urban readiness for OHCA incidents.  
97 Previous studies have demonstrated the advantage of urban areas over rural areas.<sup>6,13,18-20</sup>  
98 However, there is no previous study that evaluated the association between OHCA prognosis  
99 and geographical factors in urban settings, and it remains unclear whether the greatest  
100 abundance of these resources in city centers will lead to the best patient outcomes. Therefore,  
101 this study aimed to elucidate the correlation between the prognosis of OHCA and  
102 geographical factors in urban settings, a challenge that is poised to become a global concern.

## 103 **Methods**

### 104 **Study design and setting**

105 This retrospective observational study aimed to evaluate the correlation between geographical  
106 features and the prognosis of patients with OHCA exhibiting a shockable rhythm who were  
107 transported to Tokyo Medical and Dental University Hospital (TMDU) between June 1, 2016  
108 and May 30, 2022. TMDU is a tertiary hospital located in the heart of Tokyo, in close  
109 proximity to the Imperial Palace, Tokyo Station, and central government offices. In Tokyo's  
110 emergency system, hospitals are classified into three distinct levels based on the projected  
111 severity of the patient's condition.<sup>21</sup> TMDU, as a tertiary hospital, specializes in treating  
112 severe, life-threatening conditions, and as such, patients with OHCA are typically directed  
113 there.

114 This research followed the guidelines outlined in the 1964 Declaration of Helsinki and  
115 its subsequent revisions, and received approval from the Institutional Review Board of  
116 TMDU (#M2022-117). Given the retrospective design of the study and use of anonymized  
117 patient and hospital data, the requirement for informed consent from patients was waived.

### 118 **Study populations**

119 This study enrolled patients with OHCA who exhibited shockable rhythm (ventricular  
120 tachycardia or ventricular fibrillation) on the arrival of the EMS team and were in a state of  
121 cardiopulmonary arrest on hospital arrival. The study excluded patients aged <18 years and  
122 those with existing “do not attempt to resuscitate” (DNAR) orders.

### 123 **Data collection**

124 The data for this study were obtained retrospectively collected from the medical records of  
125 the patients: age, sex, Glasgow–Pittsburgh Cerebral Performance Category (CPC) scale score  
126 30 days after hospital admission, EMS time-related details (time of EMS request, EMS

127 arrival, on-site departure, and hospital arrival), and EMS geographical data (name of  
128 building, town, street, and address).

## 129 **Outcomes and definitions**

130 The primary analysis involved the geographical assessment of neurological outcomes.  
131 Additional evaluations of the EMS on-scene response time (the duration from the EMS  
132 team's arrival at the scene to departure) and transport time (the duration from departure from  
133 the scene to arrival at the emergency department) were performed. Neurological outcomes  
134 were assessed using the CPC scale. A score of CPC 1 signifies consciousness with normal  
135 function or only slight disability, CPC 2 represents consciousness with moderate disability,  
136 CPC 3 indicates consciousness with severe disability, CPC 4 denotes coma or vegetative  
137 state, and CPC 5 stands for death.<sup>22</sup> For the analysis, patients were divided into those with  
138 CPC 1 or 2 (signifying good neurological outcomes) and those with CPC 3, 4, or 5  
139 (indicating poor neurological outcomes).

## 140 **Statistical analysis**

### 141 *Bayesian spatial model*

142 We assumed that there is a possibility of good neurological outcome  $P(x_i)$  at each data point  
143  $x_i$ . By denoting the number of people  $N_i$  at location  $x_i$ , the number of people with good  
144 neurological outcomes (CPC 1 or 2)  $Y_i$  follows the distribution:

$$Y_i | P(x_i) \sim \text{Binomial}(N_i, P(x_i)) \#(1)$$

145  $P(x_i)$  at each location is modeled through the logit link function:

$$\text{logit}(P(x_i)) = \beta_0 + D\beta + \xi(x_i) \#(2)$$

146  $\beta_0$  denotes the intercept. Age and sex in each sample location were analyzed as covariates in  
 147 the model and defined  $\beta = (\beta_{\text{age}}, \beta_{\text{sex}})$  a vector of the covariate coefficients.  $D$  is a design  
 148 matrix with rows corresponding to the covariate data for each sample location. Here,  $\xi(x)$  is  
 149 a zero-mean Gaussian process with a Matérn covariance function<sup>23</sup> as follows:

$$\text{Cov}(\xi(x_i), \xi(x_j)) = \text{Cov}(\xi_i, \xi_j) = \frac{\sigma^2}{2^{\lambda-1}\Gamma(\lambda)} (\kappa \|x_i - x_j\|)^{\lambda} K_{\lambda}(\kappa \|x_i - x_j\|) \#(3)$$

150  $\|x_i - x_j\|$ : Euclidean distance between locations  $x_i, x_j$ ,  $\sigma^2$ : marginal variance.

151  $K_{\lambda}$  is the modified Bessel function of second kind, order  $\lambda(> 0)$ : smoothness parameter,

152  $\kappa(> 0)$ : scaling parameter related to the spatial correlation range.

153 *Stochastic Partial Differential Equation approach*

154 The Stochastic Partial Differential Equation (SPDE) approach enables approximation of a  
 155 continuous process using discrete random process.<sup>24</sup> SPDE can be written as

$$(\kappa^2 - \Delta)^{\alpha/2}(\tau\xi(x)) = \mathcal{W}(x) \#(4)$$

156 Where  $s \in \mathbb{R}^d$ ,  $\Delta$ : Laplacian,  $\alpha$ : smoothness parameter,  $\kappa$ : *scale parameter*,  $\tau$ : variance,

157  $\mathcal{W}(s)$ : Gaussian spatial white noise process. This solution can be given by the Matérn

158 covariance equation (3) and can be approximated using the finite element method, which can

159 be represented by

$$\xi(x) = \sum_{g=1}^G \varphi_g(x) \widetilde{\xi}_g \#(5)$$

160  $G$ : total number of vertices of triangulation,  $\varphi_g$ : basis functions,  $\widetilde{\xi}_g$ : zero-mean Gaussian-

161 distributed weights.

162 *Bayesian inference using Integrated Nested Laplace Approximation*

163 The Bayesian inference was performed using Integrated Nested Laplace Approximation  
164 (INLA).<sup>25</sup> The marginal posteriors of parameters  $z = (\beta_0, \beta, \xi)$ , and the hyper-parameters  $\theta$ ,  
165 can be represented by the following equation,

$$p(z|y) = \int p(z|\theta, y) p(\theta|y) d\theta \quad \#(6)$$

166 In the INLA approach, the integrand is approximated using the Laplace  
167 approximation, and numerical integration is performed. A detailed description is written  
168 elsewhere.<sup>26</sup>

169 *Gaussian Process Regression between temporal information and neurological outcomes*

170 Gaussian Process Regressions<sup>27</sup> were conducted to elucidate the correlation between EMS  
171 on-scene response time and neurological outcomes and between transport time and  
172 neurological outcomes. The models were almost identical to equations (1) and (2); however,  
173 in this analysis, geographical information  $x_i$  was substituted with temporal information  $t_i$ .

$$Y_i|P(t_i) \sim \text{Binomial}(N_i, P(t_i)) \quad \#(7)$$

$$\text{logit}(P(t_i)) = \zeta(t_i) \quad \#(8)$$

174  $\zeta(t)$  is a Gaussian process with Gaussian kernel:<sup>23</sup>

$$k(t_i, t_j) = \exp(-\beta ||t_i - t_j||^2) \quad \#(9)$$

176 *Software*

177 The statistical analyses were conducted using R software (version 4.1.2; R Foundation for  
178 Statistical Computing, Vienna, Austria). Geospatial analyses were conducted using R-INLA

179 (version 18.07.12). Google Maps Platform (<https://mapsplatform.google.com/>) was used to  
180 display the analyzed geographic information.

181

## 182 **Results**

183 A total of 835 patients with OHCA were identified during the study period. Of these, 110  
184 exhibited shockable rhythms on arrival of the EMS team. None of the patients was under the  
185 age of 18 years, and none had existing DNAR orders. Table 1 presents the demographic  
186 characteristics of the patients. The distribution of the 30-day CPC scores was as follows: CPC  
187 1–18 (16.4%), CPC 2–16 (14.5%), CPC 3–14 (12.7%), CPC 4–12 (10.9%), and CPC 5–56  
188 (50.9%).

### 189 *Neurological prognosis in relation to geographical features*

190 The neurological outcomes of patients with OHCA and their correlation with geographical  
191 factors are presented in Figure 1 (figures without annotations are provided in Figure S1).

192 Overall, there was a trend toward an improved neurological prognosis with increasing  
193 proximity to TMDU. However, it is noteworthy that despite being close to TMDU (2–8 km  
194 northeast of TMDU) and other tertiary hospitals, the region exhibited poor neurological  
195 outcomes (the area within the dotted line).

### 196 *Geographical differences in EMS on-scene response time and transport time*

197 Geographical variations in the on-scene response time and transport time are depicted in  
198 Figure 2A and 2B, respectively. Figure 2B reveals a roughly positive correlation between the  
199 hospital's distance and transport duration, with longer transport times associated with more  
200 distant locations. Figure 2A demonstrates the prolonged on-scene response times (median

201 18.0 min [25th–75th percentiles: 13.5–25.0 min ]) within the area delineated by the dotted  
202 line in Figure 1.

203 *Correlation between EMS on-scene response time/transport time and neurological outcomes*

204 Figure 3A, B shows the correlations between on-scene response time and neurological  
205 prognosis and between transport time and neurological prognosis, respectively. Figure 3A  
206 illustrates that an increase in on-scene response time from 0 to 30 minutes results in a 50%  
207 decrease in patients with favorable neurological outcomes. Similarly, Figure 3B reveals that  
208 extending the transport time from 0 to 15 minutes leads to a 25% decrease in the percentage  
209 of patients with favorable outcomes. Both outcomes suggested that a longer duration was  
210 correlated with a worse prognosis. Notably, the on-scene response time appeared to have a  
211 more significant impact on neurological outcomes than the extended transport time.

212

213 **Discussion**

214 Previous studies have demonstrated a positive correlation between the degree of urbanization  
215 and the prognosis of patients with OHCA. These studies have generally compared urban  
216 areas with rural and/or suburban areas.<sup>6,13,18–20</sup> However, to our knowledge, this is the first  
217 study that specifically investigates the regional variations within the urban areas themselves.  
218 We observed an area with a high concentration of advanced medical facilities that  
219 paradoxically demonstrated poor neurological outcomes. This area exhibited a longer  
220 duration of on-site EMS activity, which had a substantial negative impact on neurological  
221 outcomes.

222 Although most existing literature focuses on assessing mortality, the current study  
223 was designed to evaluate the neurological prognosis. This approach aims to mitigate  
224 perceived arbitrariness: a significant number of patients with poor neurological outcomes are



225 faced with the decision to withdraw treatment.<sup>28</sup> Moreover, we confined our study to OHCA  
226 cases involving patients who presented with shockable rhythms. This limitation was  
227 implemented because the initial rhythm poses a substantial confounder,<sup>29</sup> which could  
228 influence the correlation between geographical features and patient prognosis even with  
229 adjustments.

230 In Tokyo's emergency system, the selection of hospitals is made by sequentially  
231 contacting the facilities, starting from those nearest to the patient's location, until a  
232 destination hospital is determined. Tertiary hospitals are densely situated in central Tokyo,  
233 with TMDU notably surrounded by these hospitals (Figure 1). Therefore, most OHCA cases  
234 in TMDU comprise patients who cannot be accommodated by other facilities. Another  
235 unique aspect of Tokyo's emergency system is that EMS teams are rarely authorized to  
236 conduct basic life support. Certain EMS teams have the permission to place an adjunct  
237 airway, operate a semi-automated external defibrillator, and insert an intravenous line, but all  
238 these treatments are only authorized under the telephonic guidance of a doctor, with no other  
239 actions being permitted.<sup>30,31</sup>

240 Prior research suggests that extended transport time does not adversely affect  
241 survival rates or neurological outcomes.<sup>32</sup> The consensus is that, despite prolonged transport  
242 times, the patient benefits from being transported to a high-level medical facility.<sup>33</sup> The  
243 findings of the current study may seem to contradict this, but they can be better understood  
244 by considering two key points. First, this was a single-center investigation; hence, the type of  
245 medical institution did not act as a confounding variable between transport time and  
246 prognosis. Second, given the limitations of the resuscitation procedures that EMS teams in  
247 Japan can execute, extended transport times can lead to delays in the provision of advanced  
248 cardiovascular life support.

249           The prolongation of on-scene time negatively affects patient outcomes, which aligns  
250 with the findings of a previous study.<sup>34</sup> Interestingly, extending the time on the scene appears  
251 to have a more detrimental impact on patient outcomes than the lengthening of transport time.  
252 This may be due to the fact that once the destination is determined, the hospital can prepare  
253 for the patient’s arrival, thereby making more efficient use of the transport time compared to  
254 the time spent on-scene.

255           This study has several limitations. First, although adjustments for confounders such as  
256 age and sex were made, the potential for unobserved and residual confounding factors could  
257 not be eliminated. Second, because this was a single-center study, we might not have  
258 captured geographical features that might only become apparent when collating data from  
259 multiple facilities. Third, our study was limited to patients with OHCA presenting with  
260 shockable rhythms. Therefore, our findings might not be generalizable to all patients with  
261 OHCA. Despite these limitations, our study is the first to focus on the demographics of  
262 patients with OHCA in urban medical systems. Poor neurological outcomes were apparent in  
263 areas with the most abundant medical systems. Based on the results of this study, it may be  
264 important to consider strategies that can effectively utilize abundant medical resources, such  
265 as pre-arranging the destination for patients with OHCA to avoid delays in transportation.

266

267 **Acknowledgments**

268 We would like to thank Editage ([www.editage.com](http://www.editage.com)) for providing excellent assistance with  
269 the English language editing.

270

271 **Disclosures**

272 None.

273

274 **Funding**

275 This study was supported by a grant-in-aid for Scientific Research from the Japan Society for  
276 the Promotion of Science (grant number: 21K16585 to AS).

277

278 **Ethical approval statement**

279 The study was conducted following the principles of the Declaration of Helsinki and was  
280 approved by the Institutional Review Board of Tokyo Medical and Dental University  
281 (#M2022-117; May 2023). The requirement for informed consent was waived because of the  
282 retrospective nature of the study and the use of anonymized data.

283

284 **Data availability:** The data are not publicly available due to privacy concerns regarding the  
285 research participants

286

287 **References**

- 288 1. Berdowski J, Berg RA, Tijssen JGP, Koster RW. Global incidence of out-of-hospital  
289 cardiac arrest and survival rates: a systematic review of 67 Prospective Studies.  
290 *Resuscitation*. 2010;81:1479–1487.
- 291 2. Meaney PA, Bobrow BJ, Mancini ME, Christenson J, de Caen AR, Bhanji F, Abella BS,  
292 Kleinman ME, Edelson DP, Berg RA, et al. Cardiopulmonary resuscitation quality:  
293 [corrected] improving cardiac resuscitation outcomes both inside and outside the  
294 hospital: a consensus statement from the American Heart Association. *Circulation*.  
295 2013;128:417–435.
- 296 3. van de Glind EMM, van Munster BC, van de Wetering FT, van Delden JJM, Scholten  
297 RJPM, Hooft L. Pre-arrest predictors of survival after resuscitation from out-of-hospital  
298 cardiac arrest in the elderly a systematic review. *BMC Geriatrics*. 2013;13:68.
- 299 4. Kitamura T, Iwami T, Nichol G, Nishiuchi T, Hayashi Y, Nishiyama C, Sakai T, Kajino  
300 K, Hiraide A, Ikeuchi H, et al. Reduction in the incidence and fatality of out-of-hospital  
301 cardiac arrest in Females of reproductive age. *Eur Heart J* 2010;31:1365–1372.
- 302 5. Iqbal MB, Al-Hussaini A, Rosser G, Salehi S, Phylactou M, Rajakulasingham R, Patel J,  
303 Elliott K, Mohan P, Green R, et al. Predictors of survival and favorable functional  
304 outcomes after an out-of-hospital cardiac arrest in patients systematically brought to a  
305 dedicated heart attack center (from the Harefield Cardiac Arrest Study). *Am J Cardiol*.  
306 2015;115:730–737.
- 307 6. Chen CC, Chen CW, Ho CK Lin BC, Chan TC. Spatial variations and resuscitation  
308 processes affecting survival after out-of-hospital cardiac arrest (OHCA). *PLOS ONE*.  
309 2015;10:e0144882.

- 310 7. Sasson C, Rogers MAM, Dahl J, Kellermann AL. Predictors of survival from out-of-  
311 hospital cardiac arrest: a systematic review and meta-analysis. *Circulation. Circ.:*  
312 *Cardiovasc. Qual. Outcomes.* 2010;3:63–81.
- 313 8. Brabham WW. Effects of on-site or dispatched automated external defibrillator use on  
314 survival after out-of-hospital cardiac arrest. *Yearbook of Cardiology.* 2012;2012:475–  
315 477.
- 316 9. Yeung J, Chilwan M, Field R, Davies R, Gao F, Perkins GD. Impact of airway  
317 management on quality of cardiopulmonary resuscitation: an observational study in  
318 patients during cardiac arrest. *Resuscitation.* 2014;85:898-904.
- 319 10. Panchal AR, Bartos JA, Cabañas JG, Donnino MW, Drennan IR, Hirsch KG,  
320 Kudenchuk PJ, Kurz MC, Lavonas EJ, Morley PT, et al. Part 3: Adult basic and  
321 advanced life support:2020 american heart association guidelines for cardiopulmonary  
322 resuscitation and emergency cardiovascular care. *Circulation.* 2020;142:S366–S468.
- 323 11. Yannopoulos D, Bartos JA, Aufderheide TP, Callaway CW, Deo R, Garcia S, Halperin  
324 HR, Kern KB, Kudenchuk PJ, Neumar RW, et al. Evolving role of the cardiac  
325 catheterization laboratory in the management of patients with out-of-hospital cardiac  
326 arrest: a scientific statement from the American Heart Association. *Circulation.*  
327 2019;139:e530–e552.
- 328 12. Strömsöe A, Svensson L, Claesson A, Lindkvist J, Lundström A, Herlitz J. Association  
329 between population density and reported incidence, characteristics, and outcomes after  
330 out-of-hospital cardiac arrest in Sweden. *Resuscitation.* 2011;82:1307–1313.
- 331 13. Nordberg P, Jonsson M, Forsberg S, Ringh M, Fredman D, Riva G, Hasselqvist-Ax I,  
332 Hollenberg J. Survival benefit of dual dispatch of EMS and firefighters in out-of-

- 333 hospital cardiac arrest may differ depending on population density: A prospective cohort  
334 study. *Resuscitation*. 2015;90:143–149.
- 335 14. Ritchie H, Roser M. Urbanization. *Our World in Data*. Published online: June 13 2018.  
336 Accessed June 17, 2023. <https://ourworldindata.org/urbanization>.
- 337 15. World Urbanization Prospects 2018. Accessed June 18, 2023.  
338 <https://www.un.org/development/desa/pd/news/world-urbanization-prospects-2018>.
- 339 16. Demographic World Urban Areas in2022. *Released*. Accessed June 6, 2023.  
340 [https://www.newgeography.com/content/007523-demographia-world-urban-areas-2022-](https://www.newgeography.com/content/007523-demographia-world-urban-areas-2022-released)  
341 [released](https://www.newgeography.com/content/007523-demographia-world-urban-areas-2022-released).
- 342 17. Shimizu K, Hibino S, Biros MH, Irisawa T, Shimazu T. Emergency medicine in Japan:  
343 past, present, and future. *Int J Emerg Med*.. 2021;14:2.
- 344 18. Gregers MC, Møller SG, Kjoelbye JS, Jakobsen LK, Grabmayr AJ, Kragh AR, Hansen  
345 CM, Torp-Pedersen C, Andelius L, Ersbøll AK, et al. Association of Degree of  
346 Urbanization and Survival in Out-of-Hospital Cardiac Arrest. *J Am Heart Assoc*.  
347 2023;12:e8322.
- 348 19. Jin Y, Chen H, Ge H, Li S, Zhang J, Ma Q. Urban-suburb disparities in pre-hospital  
349 emergency medical resources and response time among patients with out-of-hospital  
350 cardiac arrest: A mixed-method cross-sectional study. *Front Public Health*.  
351 2023;11:1121779.
- 352 20. Smith A, Masters S, Ball S, Finn J. The incidence and outcomes of out-of-hospital  
353 cardiac arrest in metropolitan versus rural locations: A systematic review and meta-  
354 analysis. *Resuscitation*. 2023;185:109655.

- 355 21. Yoshioka T, Sugimoto T. Tertiary emergency care in Japan. *Am J Emerg Med.*  
356 1985;3:252–257.
- 357 22. Cummins RO, Chamberlain DA, Abramson NS, Allen M, Baskett P, Becker L, Bossaert  
358 L, Deloos H, Dick W, Eisenberg M. Recommended Guidelines for Uniform Reporting  
359 of Data from Out-of-Hospital Cardiac Arrest: the Utstein Style. A statement for health  
360 professionals from a task force of the American Heart Association, the European  
361 Resuscitation Council, the Heart and Stroke Foundation of Canada, and the Australian  
362 Resuscitation Council. *Circulation* 1991; 84(2):960–975.
- 363 23. Genton MG. Classes of kernels for machine learning: a statistics perspective. *J Mach*  
364 *Learn Res.* 2002;2:299–312.
- 365 24. Lindgren F, Rue H, Lindström J. an explicit link between gaussian fields and gaussian  
366 markov random fields: the stochastic partial differential equation approach. *J R Stat Soc*  
367 *Series B Stat Methodol.* 2011;73:423–498.
- 368 25. Rue H, Martino S, Chopin N. Approximate Bayesian Inference for Latent Gaussian  
369 Models by Using Integrated Nested Laplace Approximations. *J R Stat Soc Series B Stat*  
370 *Methodol.* 2009;71:319–392.
- 371 26. Bakka H, Rue H, Fuglstad GA, et al. Spatial Modeling with R-INLA: A Review. *Wiley*  
372 *Interdiscip Rev Comput Stat.* 2018;10:e1443.
- 373 27. Rasmussen CE, Williams CKI. Gaussian Processes for Machine Learning. Published  
374 Online 2006. <https://link.springer.com/content/pdf/10.1007/b100712.pdf#page=71>.

- 375 28. Perkins GD, Callaway CW, Haywood K, Neumar RW, Lilja G, Rowland MJ, Sawyer  
376 KN, Skrifvars MB, Nolan JP. Brain injury after cardiac arrest. *Lancet*. 2021;398:1269–  
377 1278.
- 378 29. Cournoyer A, Cossette S, Potter BJ, Daoust R, de Montigny L, Londei-Leduc L,  
379 Lamarche Y, Ross D, Morris J, Chauny JM, et al. Prognostic impact of the conversion to  
380 a shockable rhythm from a non-shockable rhythm for patients suffering from out-of-  
381 hospital cardiac arrest. *Resuscitation*. 2019;140:43–49.
- 382 30. Shin SD, Ong MEH, Tanaka H, Ma MH, Nishiuchi T, Alsakaf O, Karim SA, Khunkhlai  
383 N, Lin CH, Song KJ, et al. Comparison of emergency medical services systems across  
384 Pan-Asian countries: a web-based survey. *Prehosp Emerg Care*. 2012;16:477–496.
- 385 31. Nakahara S, Nagao T, Nishi R, Sakamoto T. Task-shift model in pre-hospital care and  
386 standardized nationwide data collection in Japan: Improved outcomes for out-of-hospital  
387 cardiac arrest patients. Accessed June 20, 2023.  
388 <https://www.jmaj.jp/detail.php?id=10.31662%2Fjmaj.2020-0074>. *JMA Journal*.  
389 2021;4:8–16.
- 390 32. Geri G, Gilgan J, Wu W, Vijendira S, Ziegler C, Drennan IR, Morrison L, Lin S. Does  
391 transport time of out-of-hospital cardiac arrest patients matter? A systematic review and  
392 meta-analysis. *Resuscitation*. 2017;115:96–101.
- 393 33. Cha WC, Cho JS, Shin SD, Lee EJ, Ro YS. The impact of prolonged boarding of  
394 successfully resuscitated out-of-hospital cardiac arrest patients on survival-to-discharge  
395 rates. *Resuscitation*. 2015;90:25–29.



396 34. de Graaf C, Beesems SG, Koster RW. Time of on-scene resuscitation in out of-hospital  
397 cardiac arrest patients transported without return of spontaneous circulation.  
398 *Resuscitation*. 2019;138:235–242.

399

**Patient Characteristics**

---

|                                                                                                                      |                  |
|----------------------------------------------------------------------------------------------------------------------|------------------|
| Sex, Female, n(%)                                                                                                    | 17 (15.5)        |
| Age, median (25th–75th percentiles)                                                                                  | 62 [52–74]       |
| Presence of witness, n(%)                                                                                            | 81 (73.6)        |
| Bystander CPR, n(%)                                                                                                  | 69 (62.7)        |
| Distance from TMDU (km), median [25th–75th percentiles]                                                              | 19.3 [12.0–29.8] |
| Time from call receipt to the arrival of the vehicle at the scene (min),<br>median [25th–75th percentiles]           | 6 [5–8]          |
| Time from the vehicle’s arrival at the scene to the departure from the<br>scene(min), median [25th–75th percentiles] | 16 [12–20]       |
| Time from departure from the scene to the arrival to arrival at the ED<br>(min), median [25th–75th percentiles]      | 7 [5.25–12]      |

**Location of cardiac arrest, n(%)**

|         |           |
|---------|-----------|
| Home    | 28 (25.5) |
| Road    | 23 (20.9) |
| Station | 15 (13.6) |
| Office  | 6 (5.5)   |
| Clinic  | 6 (5.5)   |
| Hotel   | 2 (1.8)   |
| Shop    | 4 (3.6)   |

---

400 Table 1: Patient demographics

401 Abbreviations: CPR: cardiopulmonary resuscitation, ED: emergency department, TMDU:

402 Tokyo Medical and Dental University

403 **Figure legends**

404 Figure 1: Neurological outcomes of patients with shockable rhythm out-of-hospital cardiac  
405 arrest in relation to geographical factors. The red circle denotes the location of tertiary  
406 medical centers, while the red triangle denotes the location of Tokyo Medical and Dental  
407 University. The area within the dotted line marks the region where neurological outcomes  
408 were poor despite its proximity to Tokyo Medical and Dental University.

409 Abbreviations: CPC: Glasgow–Pittsburgh Cerebral Performance Category.

410

411 Figure 2: The on-scene response time (the time from the vehicle's arrival at the scene to the  
412 departure from the scene) in relation to geographical factors (A). The transfer time (the  
413 duration from departure from the scene to arrival at the emergency department) in relation to  
414 geographical factors (B).

415

416 Figure 3: The relation between the on-scene response time (the duration from the EMS  
417 team's arrival at the scene to departure) and neurological outcomes (A) and the relation  
418 between transport time (the duration from departure from the scene to arrival at the  
419 emergency department) and neurological outcomes (B).

420 Abbreviations: CPC: Glasgow–Pittsburgh Cerebral Performance Category; EMS: emergency  
421 medical services

422 **Supplemental Material**

423 Figure S1. The original of Figure 1 without annotations.

424

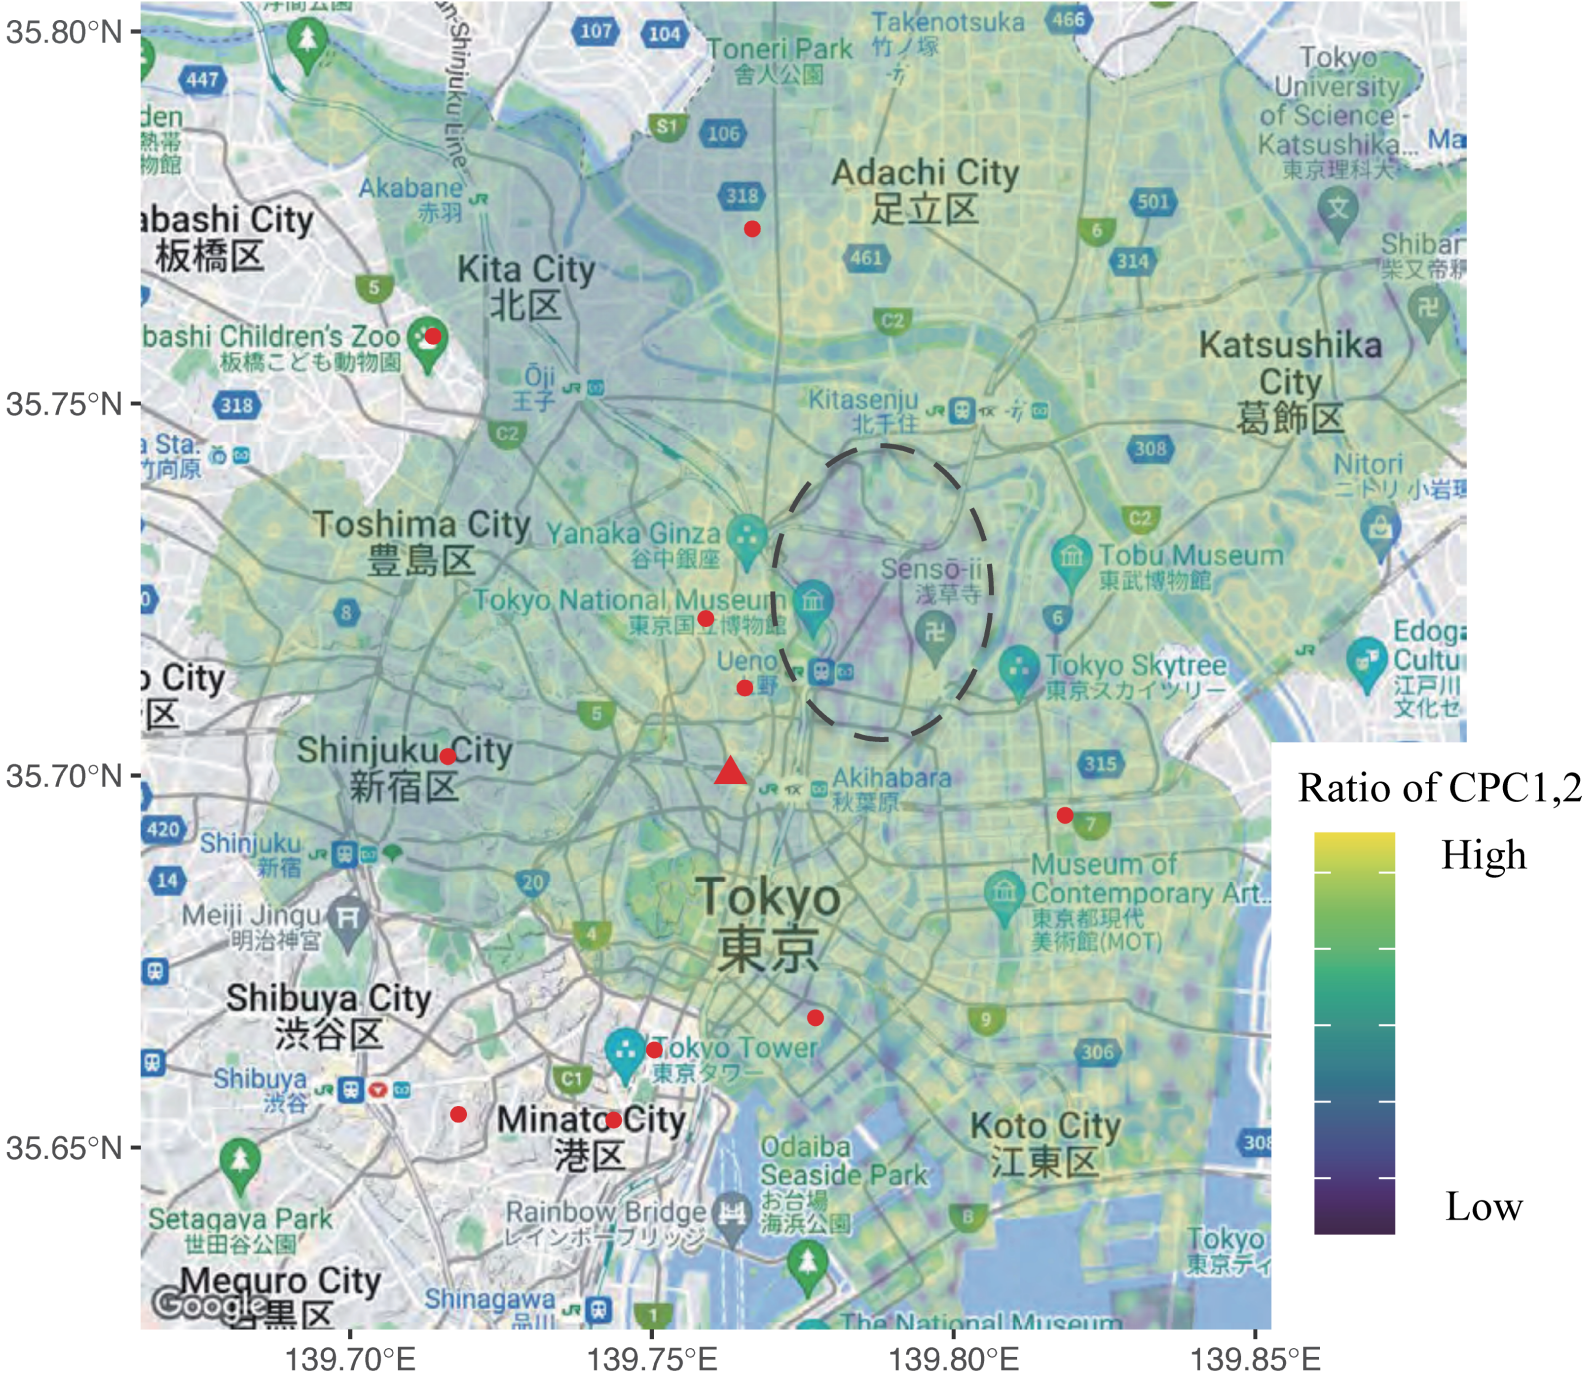

Ratio of CPC1,2

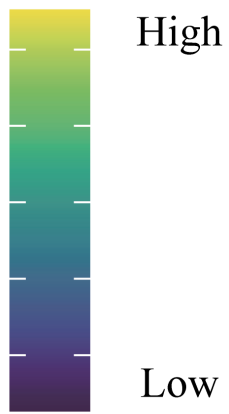

(A)

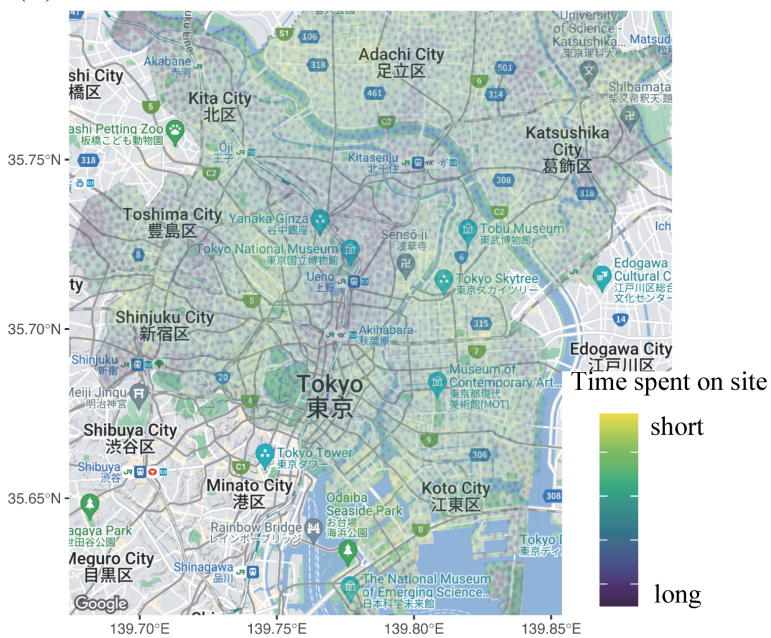

(B)

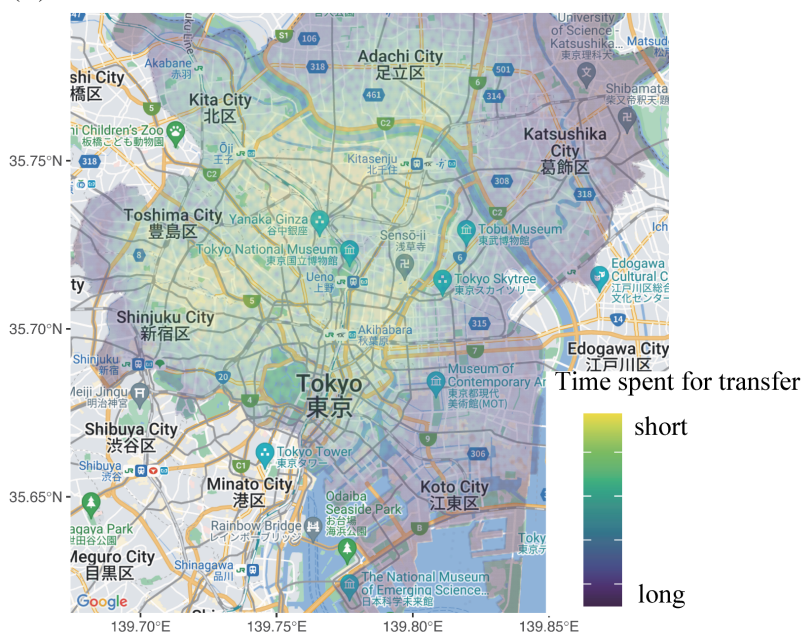



(A)

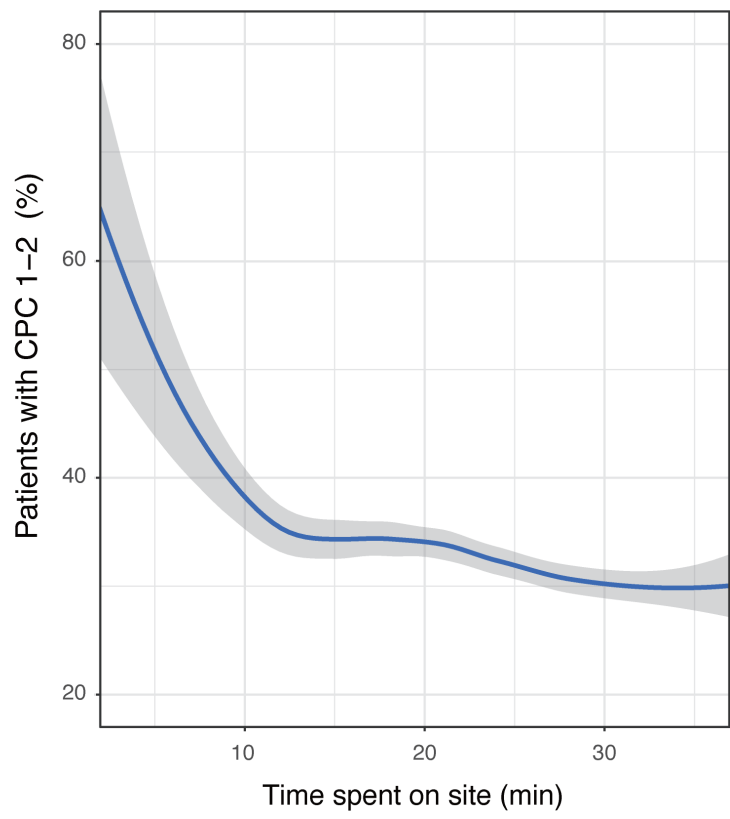

(B)

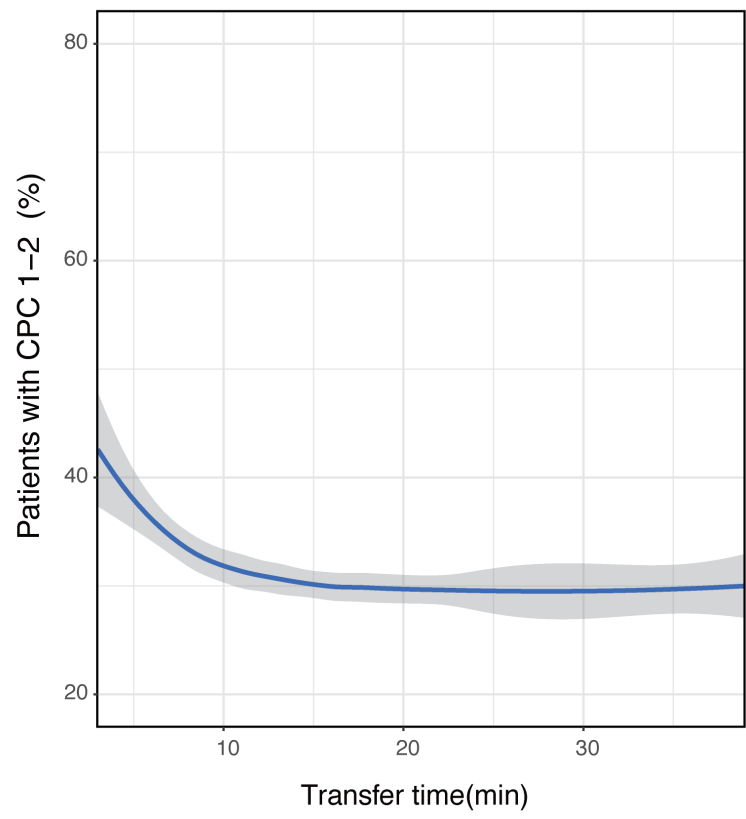

Source: https://medrxiv.org/content/10.1101/2023.07.05.23292271v1.full.pdf
